# Supplementary material for: How nitrogen modifies the nuclear magnetic shielding in tetraazanaphthalenes
Source: Royal Society of Chemistry journal article supplement (doi:10.1039/b823388h), 2009-01-01
Supplement: b823388h.pdf [file b823388h.pdf]

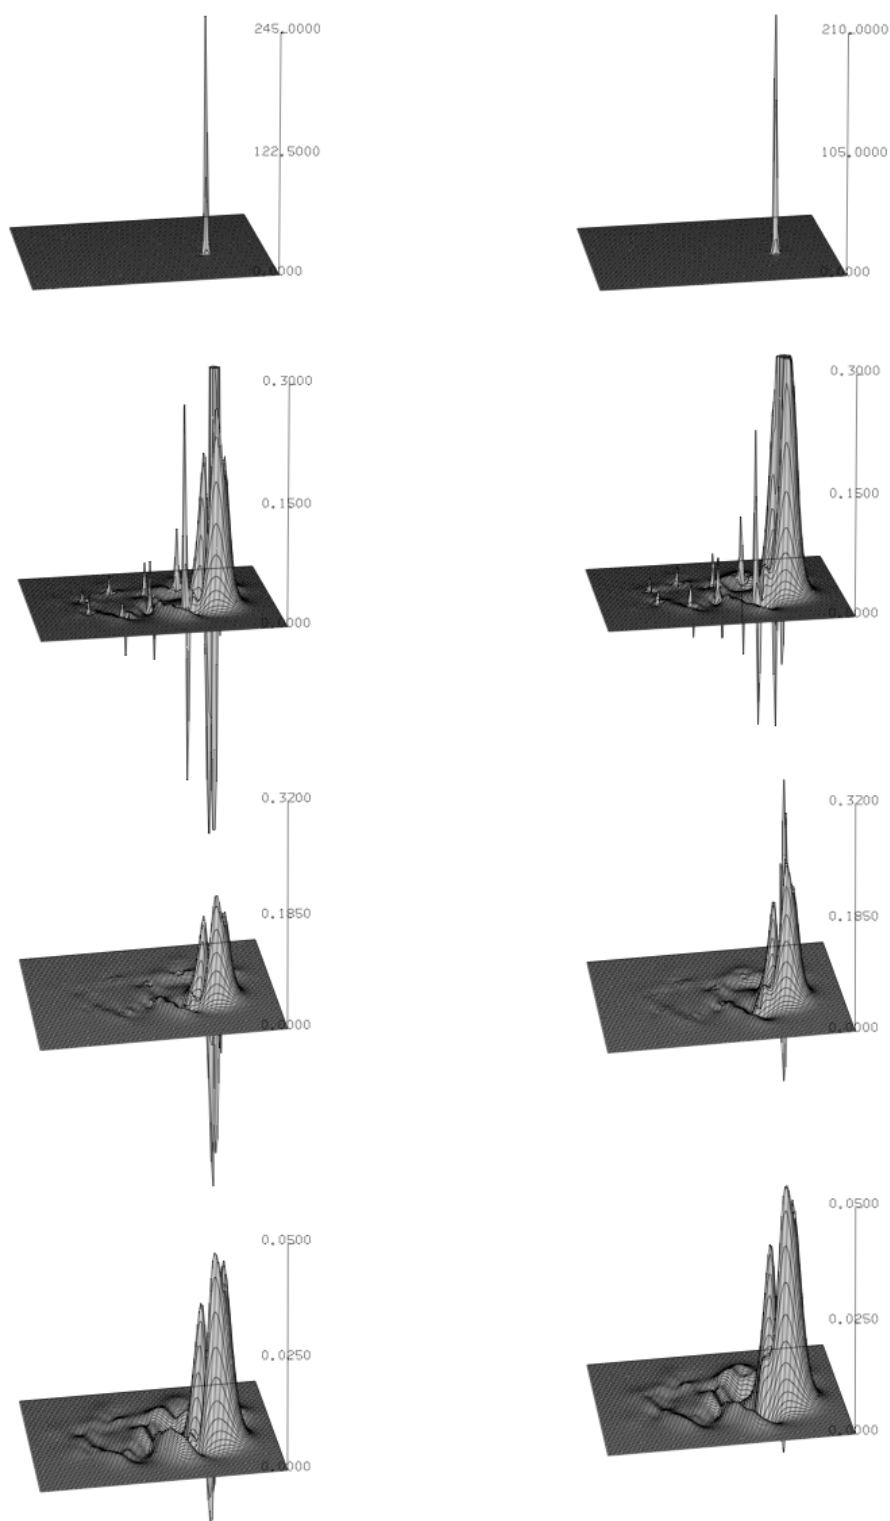

**Supplementary Figure.** N4 magnetic shielding density maps ( $\Sigma^{(\text{core}+\sigma)}_{zz}$ ) at different heights over the molecular plane
